# Supplementary material for: Induced PTF1a expression in pancreatic ductal adenocarcinoma cells activates acinar gene networks, reduces tumorigenic properties, and sensitizes cells to gemcitabine treatment
Source: PubMed Central journal article supplement (PMC6026875; doi:10.1002/1878-0261.12314), 2018-05-21
Supplement: MOL2-12-1104-s001.pdf [file MOL2-12-1104-s001.pdf]

PROMOTER MOTIFS

TET-PTF1A INDUCED DEG PROMOTER MOTIFS

| Rank | Motif                                                                               | P-value | % of Targets | % of Background | Best Match/Details                                  |
|------|-------------------------------------------------------------------------------------|---------|--------------|-----------------|-----------------------------------------------------|
| 1    |    | 1e-127  | 81.35%       | 61.69%          | POL003.1_GC-box/Jaspar(0.845)                       |
| 2    |    | 1e-80   | 64.70%       | 47.90%          | Elk4(ETS)/Hela-Elk4-ChIP-Seq(GSE31477)/Homer(0.941) |
| 3    |    | 1e-60   | 60.54%       | 46.04%          | PH0126.1_Obox6/Jaspar(0.679)                        |
| 4    |    | 1e-58   | 7.37%        | 2.12%           | GFY(?)/Promoter/Homer(0.985)                        |
| 5    |   | 1e-53   | 31.40%       | 19.84%          | NFY(CCAAT)/Promoter/Homer(0.957)                    |
| 6    |  | 1e-46   | 64.45%       | 51.85%          | Atf1/MA0604.1/Jaspar(0.768)                         |
| 7    |  | 1e-44   | 59.86%       | 47.46%          | NRF(NRF)/Promoter/Homer(0.912)                      |
| 8    |  | 1e-29   | 18.40%       | 11.46%          | PB0161.1_Rxra_2/Jaspar(0.605)                       |
| 9    |  | 1e-25   | 59.61%       | 50.26%          | PB0109.1_Bbx_2/Jaspar(0.741)                        |
| 10   |  | 1e-22   | 33.05%       | 25.17%          | PB0192.1_Tcfap2e_2/Jaspar(0.669)                    |

TET-PTF1A REPRESSED DEG PROMOTER MOTIFS

| Rank | Motif                                                                               | P-value | % of Targets | % of Background | Best Match/Details                                  |
|------|-------------------------------------------------------------------------------------|---------|--------------|-----------------|-----------------------------------------------------|
| 1    |    | 1e-92   | 63.06%       | 45.35%          | POL003.1_GC-box/Jaspar(0.939)                       |
| 2    |    | 1e-49   | 19.41%       | 10.60%          | NFY(CCAAT)/Promoter/Homer(0.960)                    |
| 3    |    | 1e-48   | 61.94%       | 49.18%          | PH0044.1_Homez/Jaspar(0.713)                        |
| 4    |    | 1e-28   | 40.66%       | 31.51%          | PH0023.1_Dlx4/Jaspar(0.643)                         |
| 5    |    | 1e-25   | 38.00%       | 29.47%          | Elk4(ETS)/Hela-Elk4-ChIP-Seq(GSE31477)/Homer(0.857) |
| 6    |   | 1e-24   | 50.11%       | 41.20%          | MYBL1/MA0776.1/Jaspar(0.816)                        |
| 7    |  | 1e-20   | 51.23%       | 43.06%          | IRF2/MA0051.1/Jaspar(0.668)                         |
| 8    |  | 1e-19   | 23.71%       | 17.36%          | NRF(NRF)/Promoter/Homer(0.906)                      |
| 9    |  | 1e-17   | 11.11%       | 7.02%           | E-box(bHLH)/Promoter/Homer(0.946)                   |
| 10   |  | 1e-16   | 87.53%       | 82.15%          | MF0010.1_Homeobox_class/Jaspar(0.754)               |

TET-MIST1 INDUCED DEG PROMOTER MOTIFS

| Rank | Motif                                                                               | P-value | % of Targets | % of Background | Best Match/Details                   |
|------|-------------------------------------------------------------------------------------|---------|--------------|-----------------|--------------------------------------|
| 1    |    | 1e-32   | 74.33%       | 49.38%          | PB0110.1_Bcl6b_2/<br>Jaspar(0.904)   |
| 2    |    | 1e-25   | 25.85%       | 10.06%          | NFY(CCAAT)/Promoter/<br>Homer(0.884) |
| 3    |    | 1e-16   | 10.95%       | 3.12%           | GFY(?)/Promoter/<br>Homer(0.976)     |
| 4    |    | 1e-12   | 1.62%        | 0.03%           | Dux/MA0611.1/<br>Jaspar(0.774)       |
| 5 *  |    | 1e-11   | 9.16%        | 3.04%           | PB0194.1_Zbtb12_2/<br>Jaspar(0.651)  |
| 6 *  |    | 1e-10   | 2.33%        | 0.16%           | PB0145.1_Mafb_2/<br>Jaspar(0.689)    |
| 7 *  |   | 1e-10   | 3.23%        | 0.38%           | EGR3/MA0732.1/<br>Jaspar(0.715)      |
| 8 *  |  | 1e-10   | 2.15%        | 0.13%           | CREB1/MA0018.2/<br>Jaspar(0.644)     |
| 9 *  |  | 1e-10   | 42.01%       | 28.77%          | Nr2e3/MA0164.1/<br>Jaspar(0.673)     |
| 10 * |  | 1e-10   | 17.59%       | 8.69%           | PROP1/MA0715.1/<br>Jaspar(0.778)     |

\*Possible False Positive

TET-MIST1 REPRESSED DEG PROMOTER MOTIFS

| Rank | Motif                                                                               | P-value | % of Targets | % of Background | Best Match/Details                                           |
|------|-------------------------------------------------------------------------------------|---------|--------------|-----------------|--------------------------------------------------------------|
| 1    |    | 1e-14   | 4.71%        | 0.19%           | Smad2(MAD)/ES-SMAD2-ChIP-Seq(GSE29422)/Homer(0.753)          |
| 2    |    | 1e-12   | 11.45%       | 2.41%           | PB0119.1_Foxa2_2/Jaspar(0.691)                               |
| 3    |    | 1e-12   | 10.44%       | 2.02%           | PB0160.1_Rfxdc2_2/Jaspar(0.740)                              |
| 4 *  |    | 1e-11   | 7.74%        | 1.18%           | Pdx1(Homeobox)/Islet-Pdx1-ChIP-Seq(SRA008281)/Homer(0.727)   |
| 5 *  |    | 1e-11   | 5.72%        | 0.57%           | PB0091.1_Zbtb3_1/Jaspar(0.674)                               |
| 6 *  |    | 1e-11   | 2.69%        | 0.05%           | Smad2(MAD)/ES-SMAD2-ChIP-Seq(GSE29422)/Homer(0.589)          |
| 7 *  |  | 1e-11   | 4.04%        | 0.23%           | ZNF692(Zf)/HEK293-ZNF692.GFP-ChIP-Seq(GSE58341)/Homer(0.708) |
| 8 *  |  | 1e-11   | 7.41%        | 1.14%           | MZF1/MA0056.1/Jaspar(0.667)                                  |
| 9 *  |  | 1e-10   | 4.04%        | 0.24%           | Nr2e3/MA0164.1/Jaspar(0.660)                                 |
| 10 * |  | 1e-10   | 8.42%        | 1.62%           | SP2/MA0516.1/Jaspar(0.723)                                   |

\*Possible False Positive
