# Supplementary material for: Induced PTF1a expression in pancreatic ductal adenocarcinoma cells activates acinar gene networks, reduces tumorigenic properties, and sensitizes cells to gemcitabine treatment
Source: PubMed Central journal article supplement (PMC6026875; doi:10.1002/1878-0261.12314), 2018-05-21
Supplement: MOL2-12-1104-s003.pdf [file MOL2-12-1104-s003.pdf]

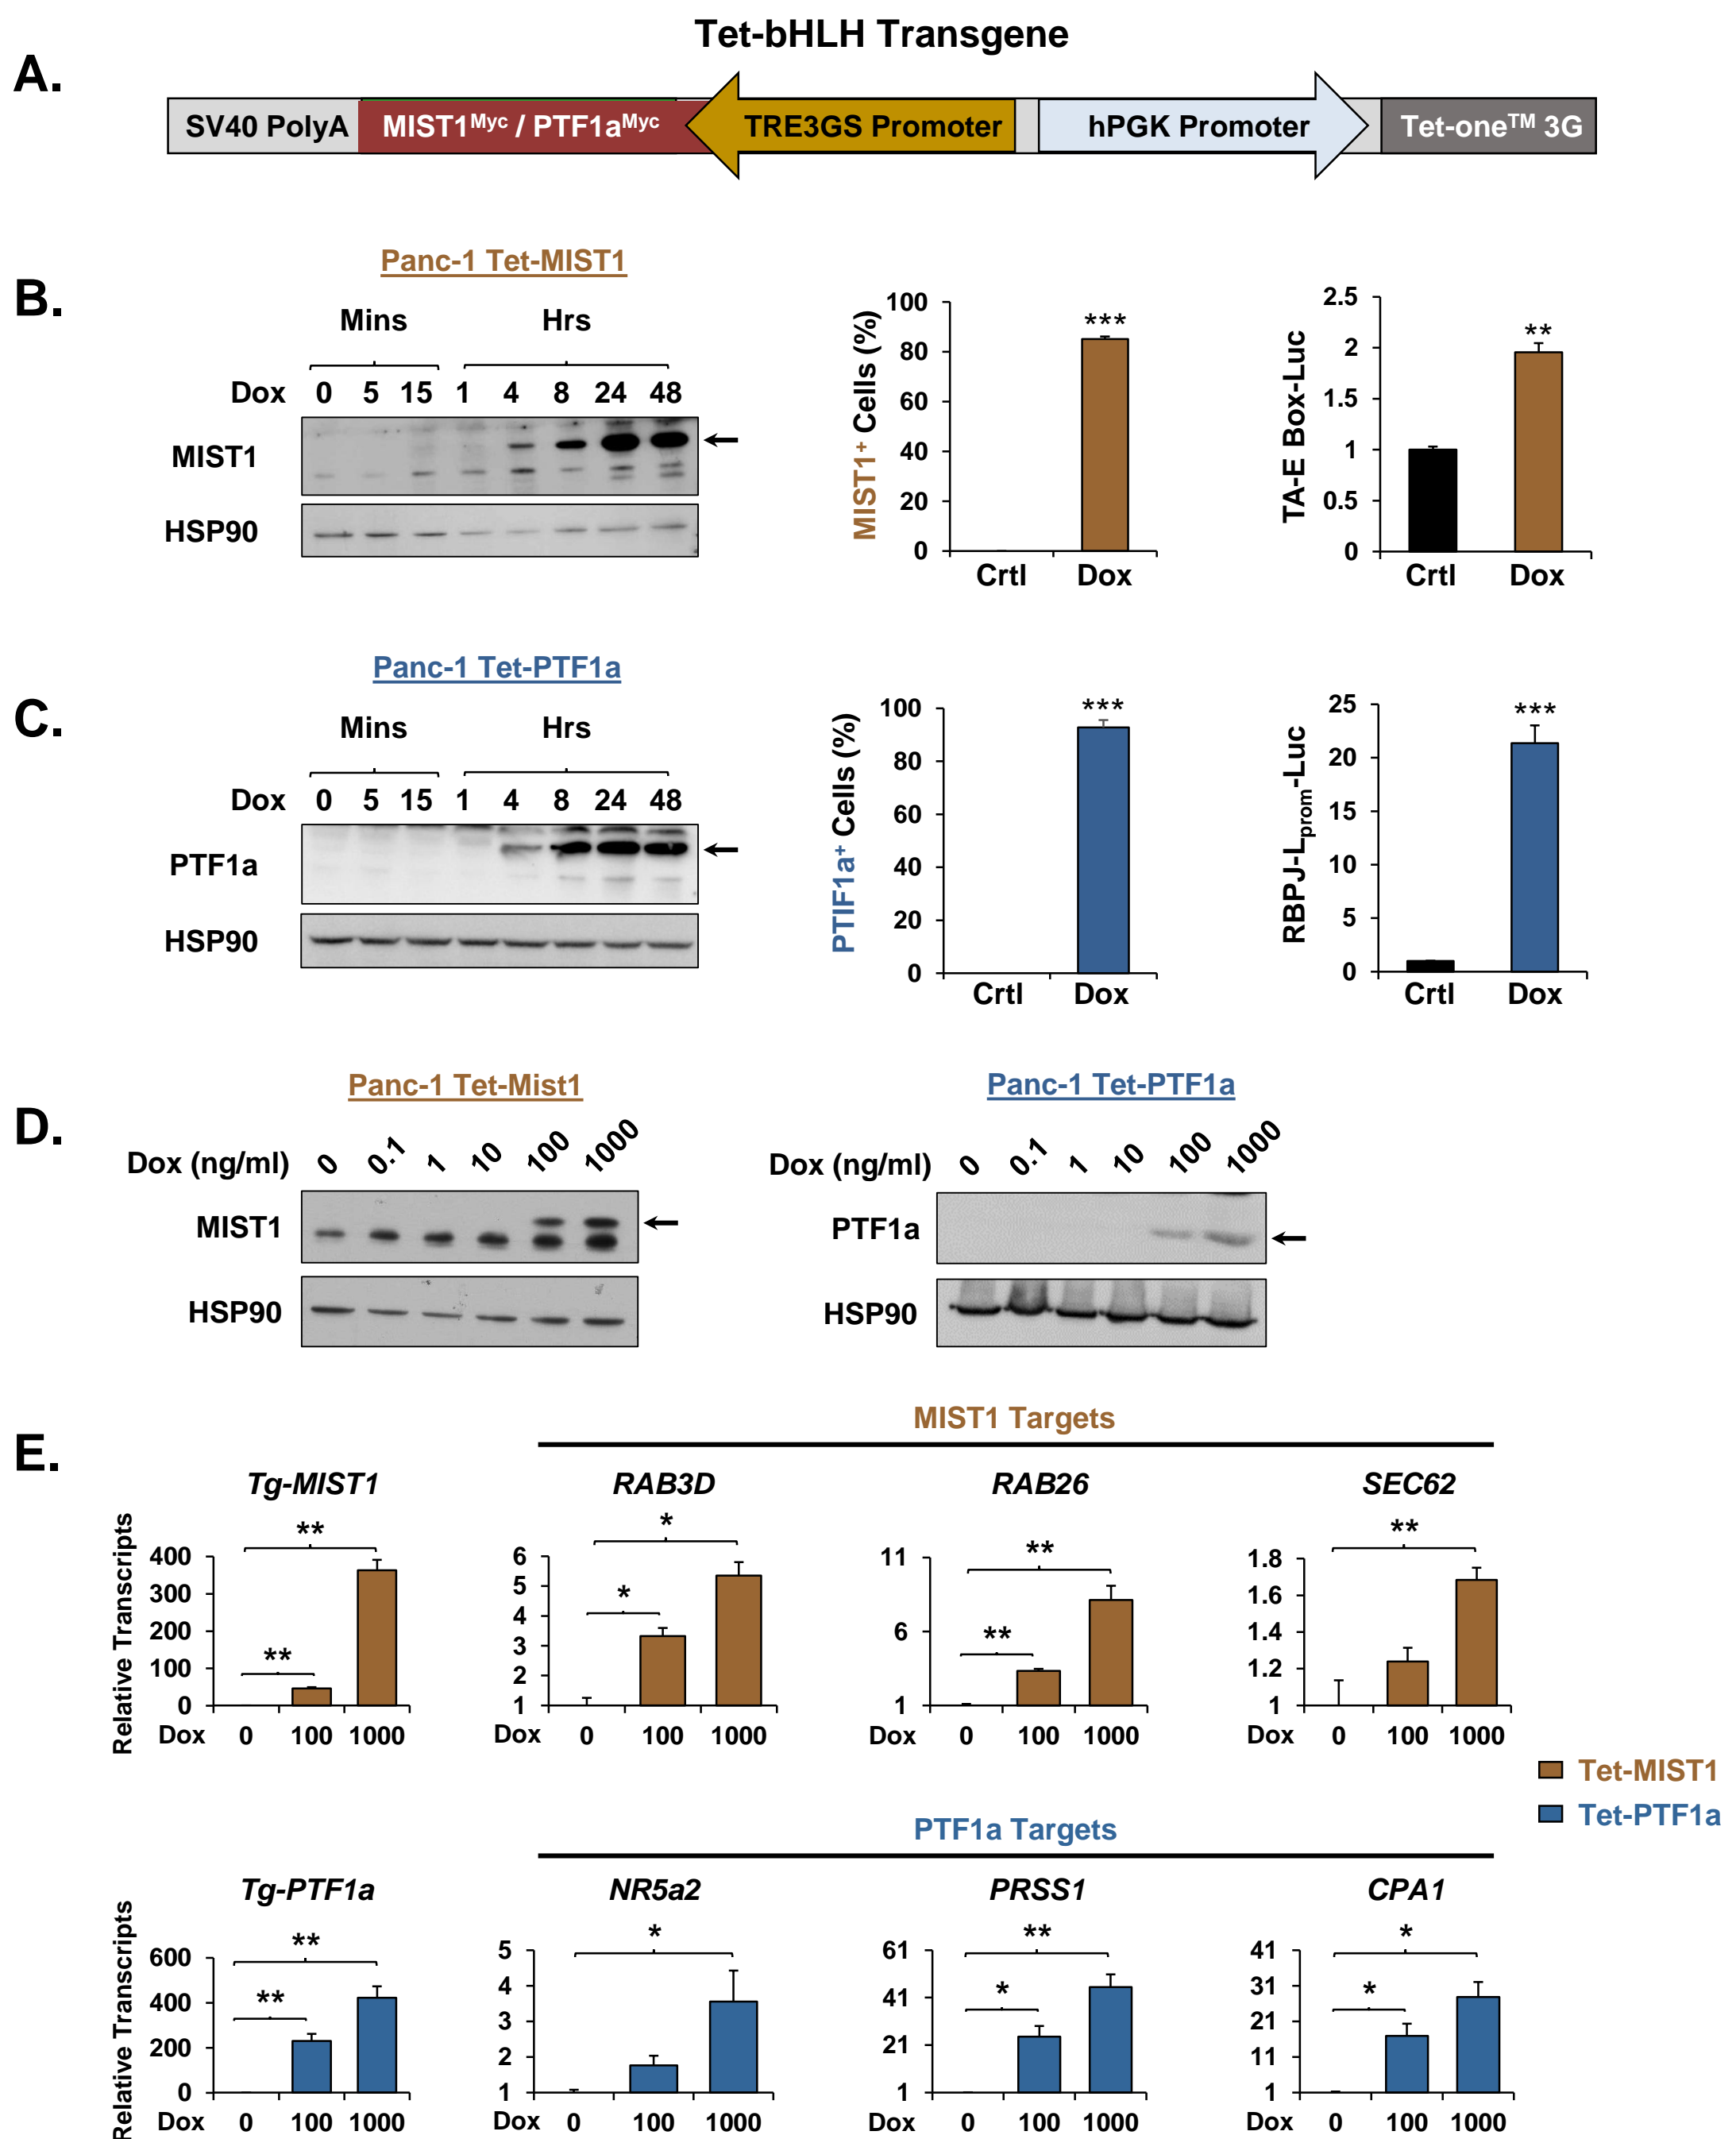

**FIGURE S1: Generation of the Tet-inducible cell lines. (A)** Schematic of Tet-inducible *MIST1*<sup>Myc</sup> and *PTF1a*<sup>Myc</sup> transgenes. **(B-C)** Immunoblot, IHC and luciferase assays of MIST1 and PTF1a expression upon doxycycline treatment. Both MIST1 and PTF1a are detected at 4 hours post-doxycycline with maximal expression reached at 24 hours. **(D)** Tet-MIST1 and Tet-PTF1a cells were treated with the indicated dox concentrations for 72 hours. Induced MIST1 and PTF1a is detectable with 100 ng/ml dox with maximum levels of expression obtained with 1  $\mu$ g/ml dox. **(E)** RT-qPCR of MIST1 and PTF1a target genes from Tet-MIST1 and Tet-PTF1a cells treated with the indicated dox concentrations. \*  $P \leq 0.05$ , \*\*  $P \leq 0.01$ , \*\*\*  $P \leq 0.001$ .

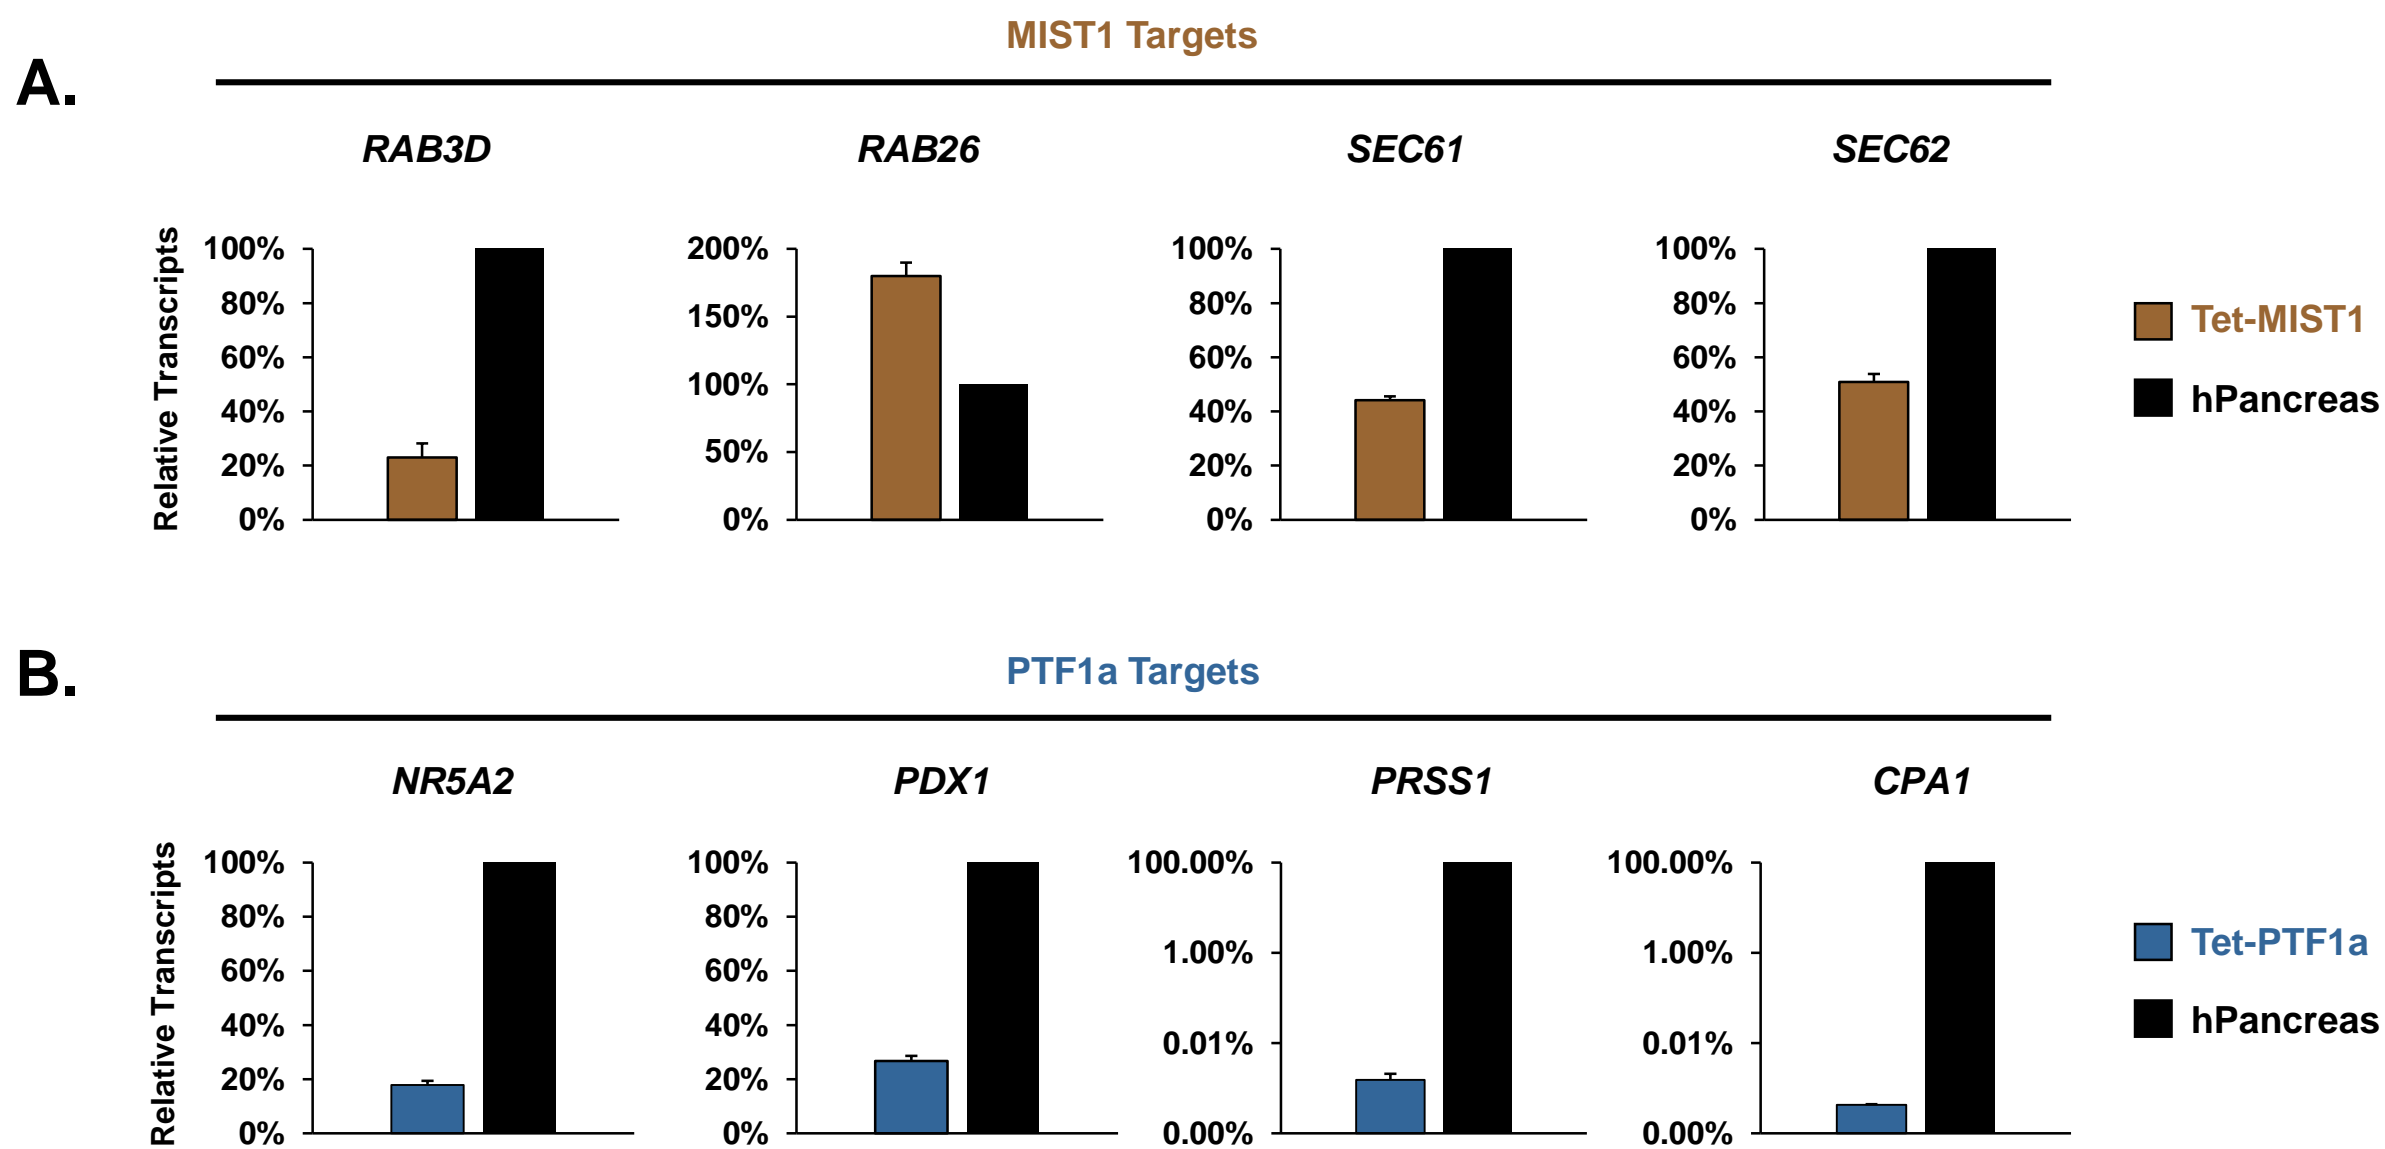

**FIGURE S2:** Comparison of Tet-MIST1 and Tet-PTF1a induced targets with human pancreas samples. **(A)** Tet-MIST1 and **(B)** Tet-PTF1a cell RNA was subjected to RT-qPCR and compared to transcript levels in a normal human pancreas sample. Note that only one human RNA sample was tested in this experiment so no statistics are presented.

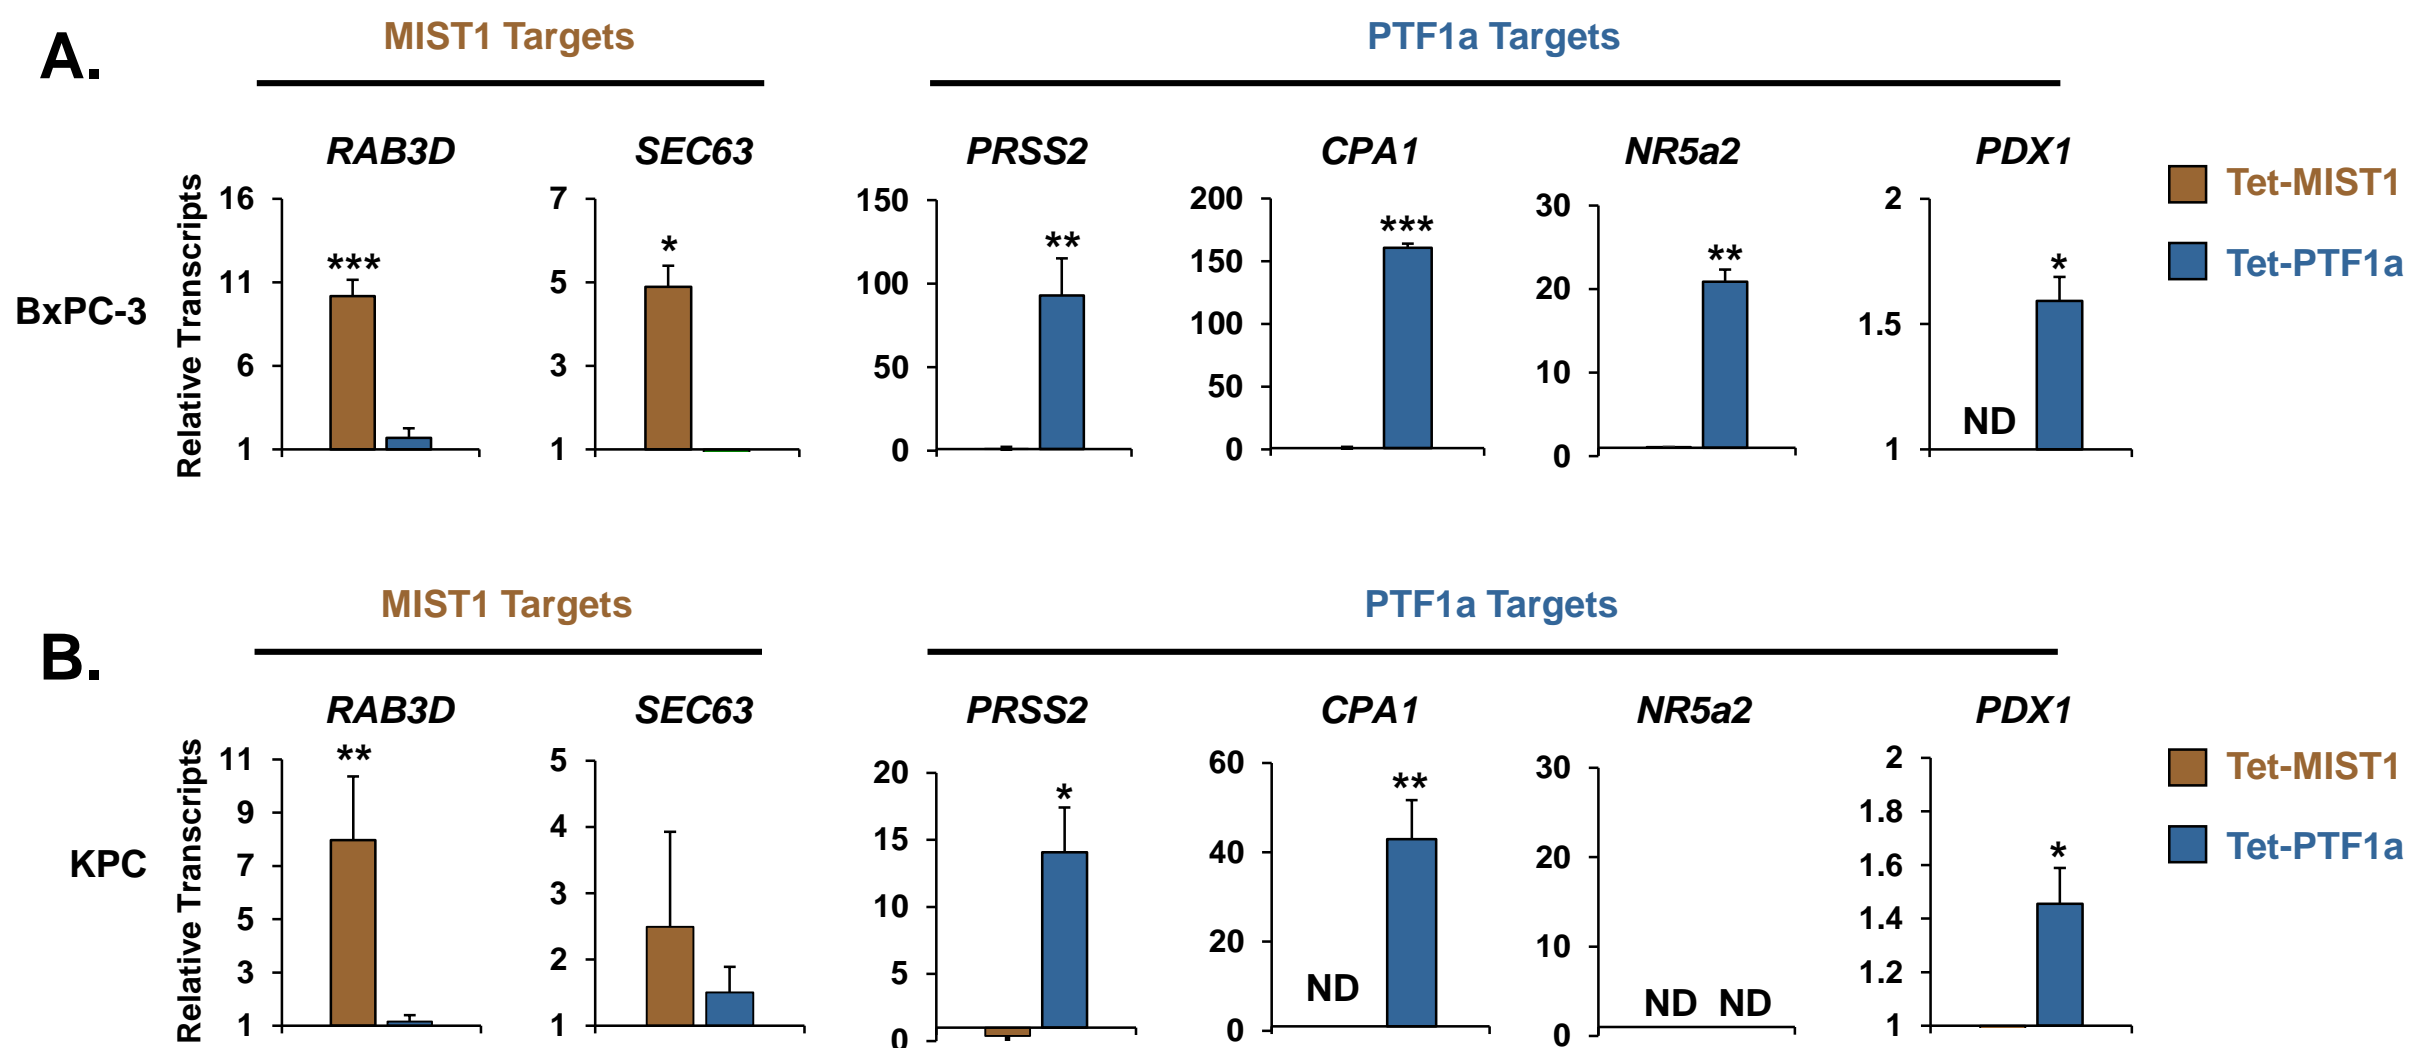

**FIGURE S3:** *BxPC-3* and *KPC* cells engineered to express *Tet-MIST1* and *Tet-PTF1a*. *Tet-MIST1* and *Tet-PTF1a* human *BxPC-3* and mouse *KPC* PDAC lines were generated and gene expression was analyzed by RT-qPCR. **(A)** MIST1 and PTF1a target gene expression in *BxPC-3* cells. **(B)** MIST1 and PTF1a target gene expression in *KPC* cells. In both cases MIST1 and PTF1a are able to induce appropriate gene expression profiles in the PDAC lines.

\*  $P \leq 0.05$ , \*\*  $P \leq 0.01$ , \*\*\*  $P \leq 0.001$ . ND - not detected.

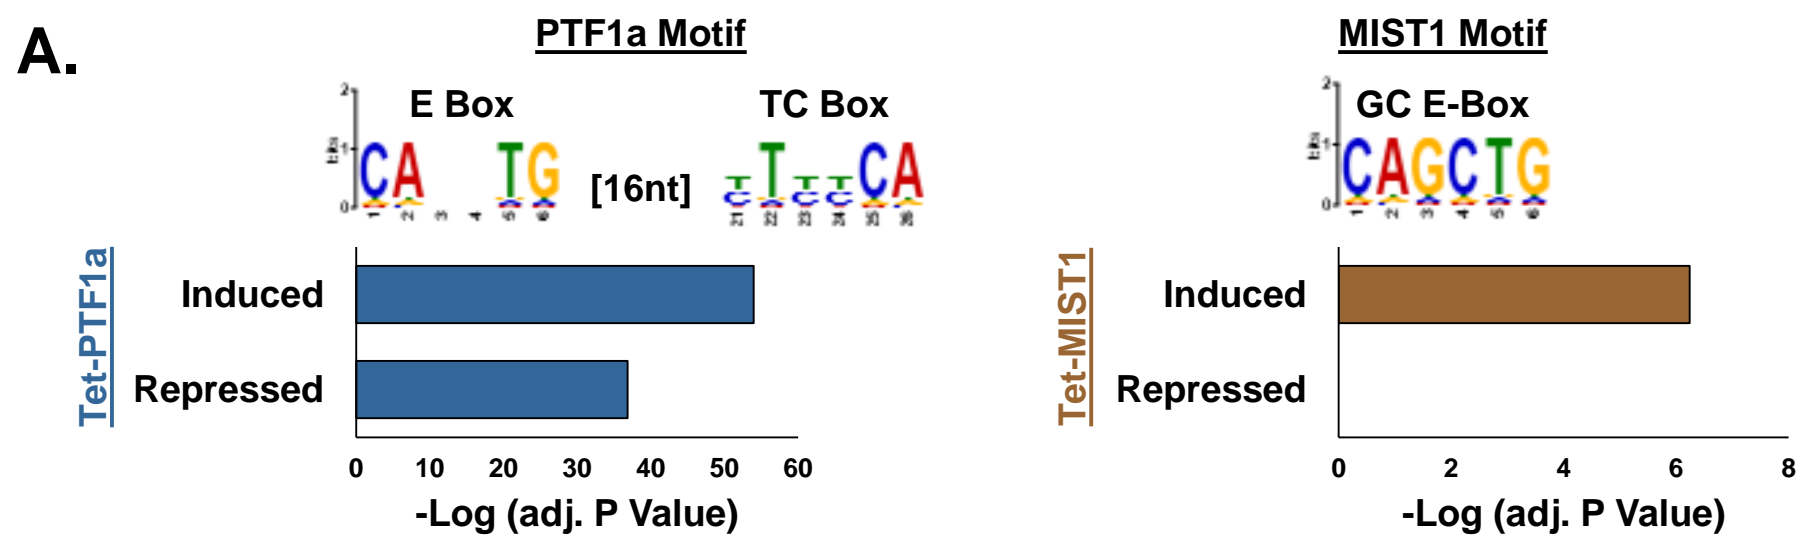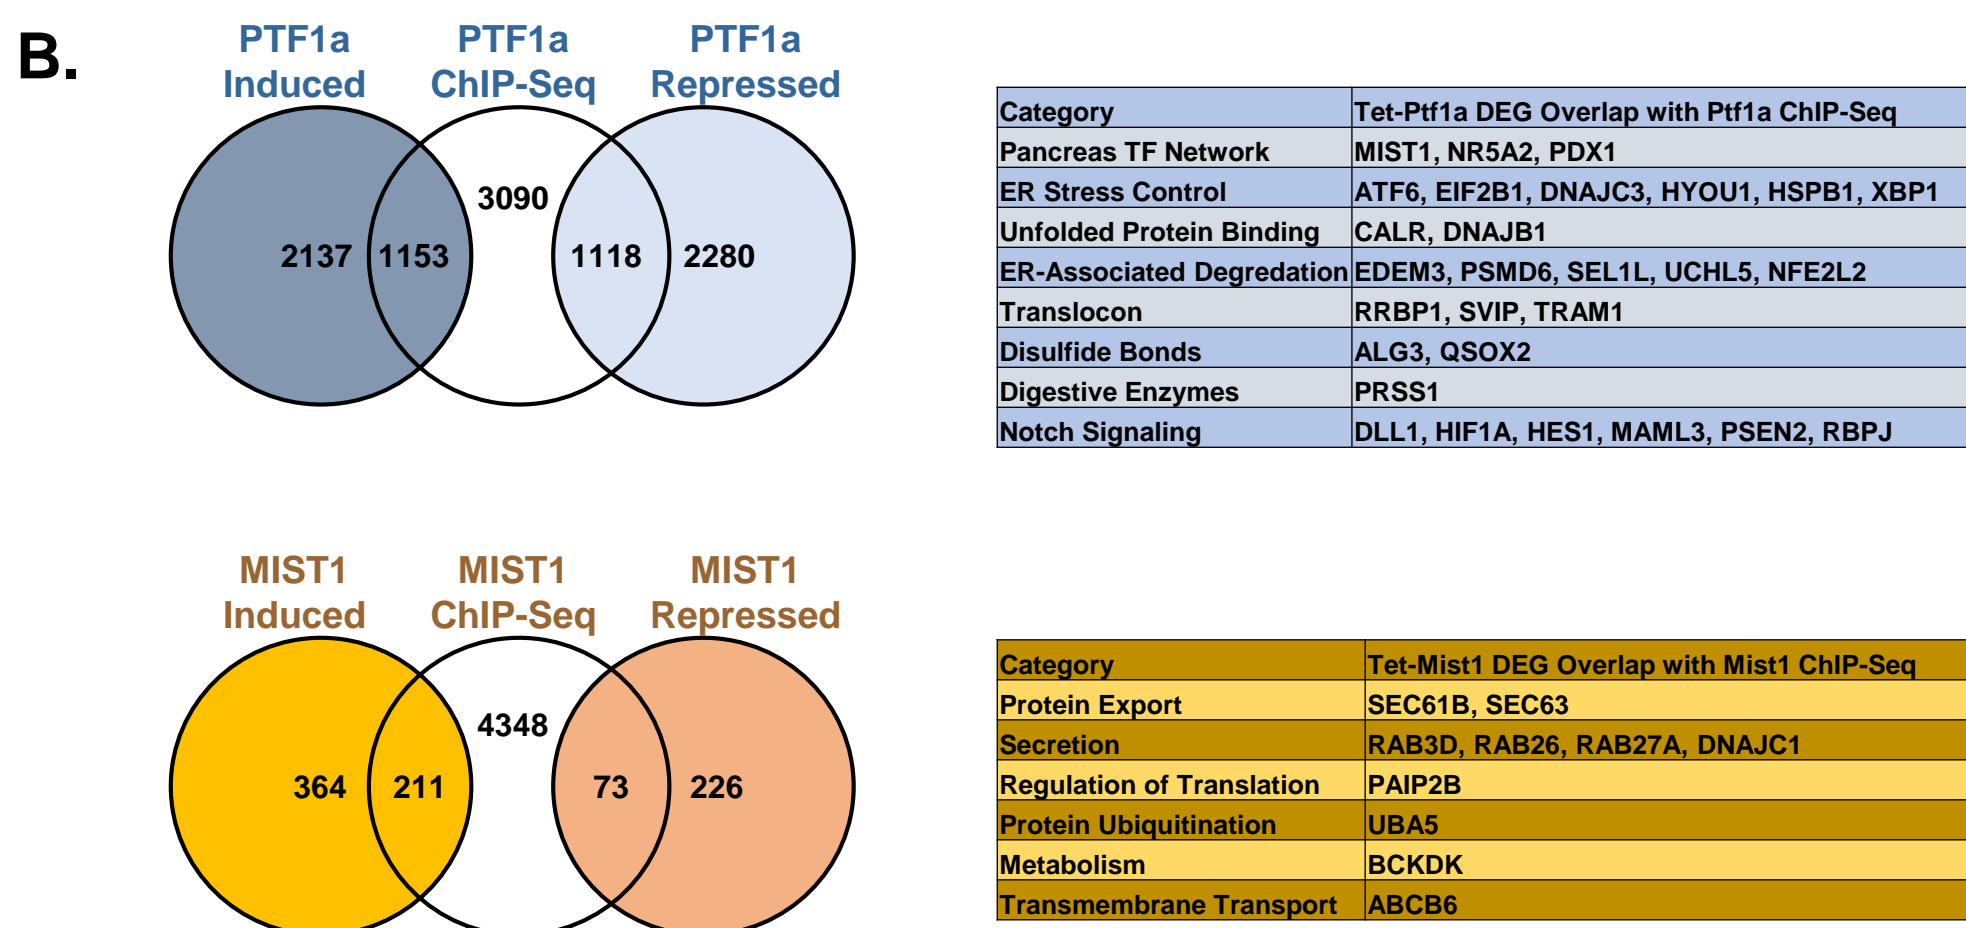

**FIGURE S4: PTF1a and MIST1 differentially expressed promoter motif enrichment and ChIP-Seq intersect.** (A) AME (MEME-Suite) was used to examine the enrichment of PTF1a or MIST1 motifs in the promoters of differentially expressed genes from the respective RNA-Seq experiments. In addition to the motif enrichment results displayed, PTF1a motifs with one helical turn between the E box and TC Box and MIST1 TA E box motifs were also included in the analysis, but were not enriched in any dataset and are therefore not represented in the figure. (B) Intersect between the differentially expressed genes from the RNA-Seq and genes with ChIP-Seq peaks from previously published mouse studies. Highlighted genes induced in the RNA-Seq and identified in the ChIP-Seq are shown in the accompanying tables. The majority of the targets listed here have been previously identified and reported in past studies.

**A.**

| Tet-PTF1a Induced Genes  |                                                                    |       |          |
|--------------------------|--------------------------------------------------------------------|-------|----------|
| ID                       | Name                                                               | #Gene | FDR      |
| <a href="#">hsa04141</a> | Protein processing in endoplasmic reticulum - Homo sapiens (human) | 66    | 4.92E-11 |
| <a href="#">hsa05169</a> | Epstein-Barr virus infection - Homo sapiens (human)                | 56    | 3.10E-03 |
| <a href="#">hsa04390</a> | Hippo signaling pathway - Homo sapiens (human)                     | 45    | 3.10E-03 |
| <a href="#">hsa04330</a> | Notch signaling pathway - Homo sapiens (human)                     | 19    | 5.46E-03 |
| <a href="#">hsa03008</a> | Ribosome biogenesis in eukaryotes - Homo sapiens (human)           | 33    | 5.46E-03 |
| <a href="#">hsa03040</a> | Spliceosome - Homo sapiens (human)                                 | 39    | 5.67E-03 |
| <a href="#">hsa04144</a> | Endocytosis - Homo sapiens (human)                                 | 64    | 8.56E-03 |
| <a href="#">hsa04392</a> | Hippo signaling pathway - multiple species - Homo sapiens (human)  | 13    | 8.56E-03 |
| <a href="#">hsa04360</a> | Axon guidance - Homo sapiens (human)                               | 47    | 8.56E-03 |
| <a href="#">hsa04722</a> | Neurotrophin signaling pathway - Homo sapiens (human)              | 35    | 8.56E-03 |

**B.**

| Tet-PTF1a Repressed Genes |                                                                   |       |          |
|---------------------------|-------------------------------------------------------------------|-------|----------|
| ID                        | Name                                                              | #Gene | FDR      |
| <a href="#">hsa01100</a>  | Metabolic pathways - Homo sapiens (human)                         | 324   | 5.62E-12 |
| <a href="#">hsa01200</a>  | Carbon metabolism - Homo sapiens (human)                          | 54    | 4.79E-11 |
| <a href="#">hsa05205</a>  | Proteoglycans in cancer - Homo sapiens (human)                    | 73    | 6.33E-08 |
| <a href="#">hsa01212</a>  | Fatty acid metabolism - Homo sapiens (human)                      | 25    | 5.62E-06 |
| <a href="#">hsa00280</a>  | Valine, leucine and isoleucine degradation - Homo sapiens (human) | 24    | 1.87E-05 |
| <a href="#">hsa04066</a>  | HIF-1 signaling pathway - Homo sapiens (human)                    | 40    | 1.87E-05 |
| <a href="#">hsa01230</a>  | Biosynthesis of amino acids - Homo sapiens (human)                | 31    | 6.90E-05 |
| <a href="#">hsa05016</a>  | Huntington's disease - Homo sapiens (human)                       | 61    | 7.54E-05 |
| <a href="#">hsa05200</a>  | Pathways in cancer - Homo sapiens (human)                         | 107   | 8.72E-05 |
| <a href="#">hsa04015</a>  | Rap1 signaling pathway - Homo sapiens (human)                     | 64    | 1.91E-04 |

**C.**

| Tet-MIST1 Induced Genes  |                                                                   |       |          |
|--------------------------|-------------------------------------------------------------------|-------|----------|
| ID                       | Name                                                              | #Gene | FDR      |
| <a href="#">hsa01100</a> | Metabolic pathways - Homo sapiens (human)                         | 62    | 2.03E-04 |
| <a href="#">hsa00280</a> | Valine, leucine and isoleucine degradation - Homo sapiens (human) | 9     | 6.55E-04 |
| <a href="#">hsa00640</a> | Propanoate metabolism - Homo sapiens (human)                      | 6     | 1.84E-02 |
| <a href="#">hsa03060</a> | Protein export - Homo sapiens (human)                             | 5     | 2.35E-02 |
| <a href="#">hsa00760</a> | Nicotinate and nicotinamide metabolism - Homo sapiens (human)     | 5     | 5.82E-02 |
| <a href="#">hsa00510</a> | N-Glycan biosynthesis - Homo sapiens (human)                      | 6     | 9.70E-02 |
| <a href="#">hsa00630</a> | Glyoxylate and dicarboxylate metabolism - Homo sapiens (human)    | 4     | 2.64E-01 |
| <a href="#">hsa00790</a> | Folate biosynthesis - Homo sapiens (human)                        | 3     | 2.64E-01 |
| <a href="#">hsa00750</a> | Vitamin B6 metabolism - Homo sapiens (human)                      | 2     | 3.42E-01 |
| <a href="#">hsa01200</a> | Carbon metabolism - Homo sapiens (human)                          | 8     | 3.58E-01 |

**D.**

| Tet-MIST1 Repressed Genes |                                                                        |       |          |
|---------------------------|------------------------------------------------------------------------|-------|----------|
| ID                        | Name                                                                   | #Gene | FDR      |
| <a href="#">hsa05146</a>  | Amoebiasis - Homo sapiens (human)                                      | 7     | 1.31E-01 |
| <a href="#">hsa05217</a>  | Basal cell carcinoma - Homo sapiens (human)                            | 4     | 8.12E-01 |
| <a href="#">hsa05200</a>  | Pathways in cancer - Homo sapiens (human)                              | 12    | 8.12E-01 |
| <a href="#">hsa04360</a>  | Axon guidance - Homo sapiens (human)                                   | 7     | 8.12E-01 |
| <a href="#">hsa00604</a>  | Glycosphingolipid biosynthesis - ganglio series - Homo sapiens (human) | 2     | 8.12E-01 |
| <a href="#">hsa04390</a>  | Hippo signaling pathway - Homo sapiens (human)                         | 6     | 8.12E-01 |
| <a href="#">hsa05205</a>  | Proteoglycans in cancer - Homo sapiens (human)                         | 7     | 8.12E-01 |
| <a href="#">hsa04512</a>  | ECM-receptor interaction - Homo sapiens (human)                        | 4     | 8.12E-01 |
| <a href="#">hsa04340</a>  | Hedgehog signaling pathway - Homo sapiens (human)                      | 3     | 8.12E-01 |
| <a href="#">hsa04015</a>  | Rap1 signaling pathway - Homo sapiens (human)                          | 7     | 8.12E-01 |

**FIGURE S5:** KEGG pathway analysis of the Tet-PTF1a and Tet-MIST1 RNA-Seq. The top 10 reported KEGG pathways from independent analysis of the induced and repressed differentially expressed genes are shown from **(A,B)** the Tet-PTF1a or **(C,D)** the Tet-MIST1 RNA-Seq.

**SUPPLEMENTAL TABLE 1: *Antibodies.***

| <b>Antibodies</b>          |                       |                |                |                       |                       |
|----------------------------|-----------------------|----------------|----------------|-----------------------|-----------------------|
| <b>Target</b>              | <b>Dilution</b>       | <b>Purpose</b> | <b>Species</b> | <b>Source</b>         | <b>Catalog Number</b> |
| <b>α-MIST1</b>             | <b>1:100 ; 1:1000</b> | <b>IF; WB</b>  | <b>Rabbit</b>  | <b>In-house</b>       | <b>-</b>              |
| <b>α-PTF1a</b>             | <b>1:50 ; 1:500</b>   | <b>IF; WB</b>  | <b>Rabbit</b>  | <b>Wright Lab</b>     | <b>-</b>              |
| <b>α-CPA1</b>              | <b>1:100</b>          | <b>IF; WB</b>  | <b>Rabbit</b>  | <b>Santa Cruz</b>     | <b>131901</b>         |
| <b>α-PRSS2</b>             | <b>1:100; 1:000</b>   | <b>IF; WB</b>  | <b>Mouse</b>   | <b>Sigma</b>          | <b>sab1400226</b>     |
| <b>α-PRSS2</b>             | <b>1:100</b>          | <b>IF</b>      | <b>Rabbit</b>  | <b>Abcam</b>          | <b>ab223064</b>       |
| <b>α-MYC</b>               | <b>1:500 ; 1:500</b>  | <b>IF; WB</b>  | <b>Mouse</b>   | <b>In-house</b>       | <b>9E10</b>           |
| <b>α-HSP90</b>             | <b>1:5000</b>         | <b>WB</b>      | <b>Rabbit</b>  | <b>Santa Cruz</b>     | <b>sc-7947</b>        |
| <b>α-Sox9</b>              | <b>1:3000</b>         | <b>IF; WB</b>  | <b>Rabbit</b>  | <b>Millipore</b>      | <b>ab5535</b>         |
| <b>α-K19</b>               | <b>1:500</b>          | <b>IF; WB</b>  | <b>Rat</b>     | <b>Dev. Studies</b>   | <b>Troma3</b>         |
| <b>α-Amylase</b>           | <b>1:250</b>          | <b>IF</b>      | <b>Rabbit</b>  | <b>Abcam</b>          | <b>ab21156</b>        |
| <b>α-S6</b>                | <b>1:2000</b>         | <b>WB</b>      | <b>Mouse</b>   | <b>Santa Cruz</b>     | <b>Sc-74459</b>       |
| <b>α-CD24 FITC</b>         | <b>1:100</b>          | <b>Flow</b>    | <b>Mouse</b>   | <b>BD Bioscience</b>  | <b>560992</b>         |
| <b>α-CD44 PE Cy5</b>       | <b>1:100</b>          | <b>Flow</b>    | <b>Rat</b>     | <b>BD Bioscience</b>  | <b>553135</b>         |
| <b>α-EPCAM</b>             | <b>1:500</b>          | <b>WB</b>      | <b>Rat</b>     | <b>BD Bioscience</b>  | <b>740389</b>         |
| <b>α-Caspase 3</b>         | <b>1:500</b>          | <b>WB</b>      | <b>Rabbit</b>  | <b>Cell Signaling</b> | <b>9662</b>           |
| <b>α-PDX1</b>              | <b>1:1000</b>         | <b>WB</b>      | <b>Rabbit</b>  | <b>Santa Cruz</b>     | <b>H-140</b>          |
| <b>α-Cleaved Caspase 3</b> | <b>1:500</b>          | <b>WB</b>      | <b>Rabbit</b>  | <b>Abcam</b>          | <b>ab2302</b>         |



**SUPPLEMENTAL TABLE 2: Mouse and human RT-qPCR primers.**

| qRT-PCR Primers   |                        |                         |
|-------------------|------------------------|-------------------------|
| Transcript        | Primer 1 Sequence      | Primer 2 Sequence       |
| <b>Transgenes</b> |                        |                         |
| Mist1 (tg)        | AGCATTACCATCACCAGCAG   | CCCTCTCTGAAGCTGTGGAT    |
| Ptf1a (tg)        | AGGTTATCATCTGCCATCGAG  | GACACAAACTCAAAGGGTGGT   |
| <b>Human</b>      |                        |                         |
| huMist1           | CCAGCACTACCAGCAGCA     | AGGACTGGGCGCTAGGTG      |
| huPtf1a           | AGAAGGTCATCATCTGCCATC  | GTCCTTTAGGACCCTTTCTG    |
| Rab26             | CGATTCAAGGATGGTGCTTT   | CCGGTAGTAGGCATGGGTAA    |
| Rab3d             | GGGGAACAAGTGTGACCTG    | CAGGGACTCGTTCATCTTCTC   |
| Sec61b            | GGGGGCTCCGTAACCTTTCTA  | TGTGTAGAATCGCCACATCC    |
| Sec62             | GGATCCAGGAAGTTGGTGAA   | CCTCTCCTTTCTTGGCCTTT    |
| Sec63             | GATCAGAATGCCGAGCAAAT   | TAAGAACAATGCCCATCCTG    |
| Perk              | GCCTTGGATCCTGAAAATCA   | GTCTTGGTCCCCTGGAAGA     |
| Dnajc1            | CGGAGACCTGGAGTTGTTTG   | CTGCCTTCGTTTCATCATCT    |
| Prss1             | TCTGTCCCCTACCAGGTGTC   | TCTTGGCTGCATTGATGAAC    |
| Prss2             | GTTGCAGCTGCTGTTGCTGCC  | TGTCATTGTCCAGAGTCCGGC   |
| Cpa1              | TGTCTTTGGCAAGGAGGACT   | ACGCCTCGATCATGGTCTC     |
| Cpa2              | AGTGGGTTACACAAGCTACG   | AGAGGCTTCCAGATACCTTG    |
| Cela3b            | GGGGCCGTCTCTATACCAAT   | CAGAAACAAAGCTGGTCACA    |
| Amy2a             | CAGACCTTGGTGGAAAGATA   | GGTACTGCTTGTTCCTGCACT   |
| Cd44              | TCCAACACCTCCCAGTATGACA | GGCAGGTCTGTGACTGATGTACA |
| Cd24              | ATGTGGCAAGGAAAACAGG    | CTCCATTCCACAATCCCATC    |
| Cd44v6            | GGAACAGTGGTTTGGCAACAG  | TTGGGTGTTTGGCGATATCC    |
| Aldh1a3           | GCAACCTGGAGGTCAAGTTC   | CCTCTGGAAGGCAACCTGT     |
| Abcg2             | GGGTGACTCATCCCAACATT   | AAGCCATTGGTGTTCCTTG     |
| Abcb1             | TGATTGCATTTGGAGGACAA   | CCAGAAGGCCAGAGCATAAG    |
| Abcc1             | GCTTTCAGAACACGGTCTCTC  | AGAGAGTTGGGCTGACCAGA    |
| Abcc2             | CTGCCACTTTGTTTTGAGCA   | GTGAGTACAAGGGCCAGCTC    |
| Abcc3             | CTCCAAGTTCTGGGACTCCA   | TGGGAGAGGATGATGTAGCC    |
| Abcc4             | TTCTTCTGGTGGCTCAATCC   | GCTTCTGTGCGTCATTCTCA    |
| Abcc5             | TGCCGCTATAAAGGCTTGTT   | AGTGCTGGTTCTCTCCCTCA    |
| Abcc6             | GGAACCAGACAGAGCCTGAA   | GGAACCAGACAGAGCCTGAA    |
| Ent1              | CTGCCTGAGCCTGAACTAGG   | CTGGTACTGGTTGTCATGG     |
| Cnt1              | CTTTGCCTTTCAGGTTCTGC   | CAAGTAGGGCCGGATCAGTA    |
| Nr5a2             | GGGTACCATTATGGGCTCCT   | GGCCCAAACCTTATTCCTTCC   |
| Pdx1              | AGCTGCCTTTCCCATGGAT    | GGAACCTCTTCTCCAGCTCT    |
| Gata6             | AGTTTTCCGGCAGAGCAGTA   | GTCAGTCAAGGCCATCCAC     |
| 18s               | GATATGCTCATGTGGTGTG    | AATCTTCTTCAGTCGCTCCA    |
| Epcam             | AATGTGTGTGCGTGGGA      | TTCAAGATTGGTAAAGCCAGT   |
| Aldh2             | AGACCCTAGCTCTGCTCTCG   | GGGAATGTTTTCTGCTGAC     |
| <b>Mouse</b>      |                        |                         |
| msMIST1           | TGGTGGCTAAAGCTACGTGT   | CATAGCTCCAGGCTGGTTTT    |
| msPTF1a           | AGGTTATCATCTGCCATCGAG  | GACACAAACTCAAAGGGTGGT   |
| msAmy             | CAGAGACATGGTGACAAGGTG  | ATCGTTAAAGTCCCAAGCAGA   |
| msSox9            | CACGGAACAGACTCACATCTC  | CCTCTCGCTTCAGATCAACTT   |
| msK19             | CCTCCCGAGATTACAACCACT  | AGGCGTGTCTGTCTCAAACCT   |
| msRplp0           | AGAAACTGCTGCCTCACATCC  | CAATGGTGCCTCTGGAGATT    |
| msRab3d           | AGTGTGACCTGGAAGACGAAC  | CCAGGGATTCATTCATCTTGT   |
| msSec63           | GCGGAGCAAATTCGATTAAT   | TGTTGCTCCAGGATCCAAAT    |
| msPRSS2           | TCTGTGGAGGTTCCCTCATC   | ACTCTGGCATTGAGGGTCAC    |
| msCPA1            | ACCTTTGAAGGTCGTCAT     | TGTTGTCAAGAATGGCCGTG    |
| msNR5a2           | CCCAAACGTGAGGAACAACCT  | TATCGCCACACACAGGACAT    |
| msPDX1            | ATGAAATCCACCAAAGCTCAC  | GGTCAAGTTCAACATCACTGC   |
